# Supplementary material for: Low 25-hydroxyvitamin D levels are more prevalent in Canadians of South Asian than European ancestry inhabiting the National Capital Region of Canada
Source: PubMed Central journal article supplement (PMC6291105; doi:10.1371/journal.pone.0207429), 2018-12-12

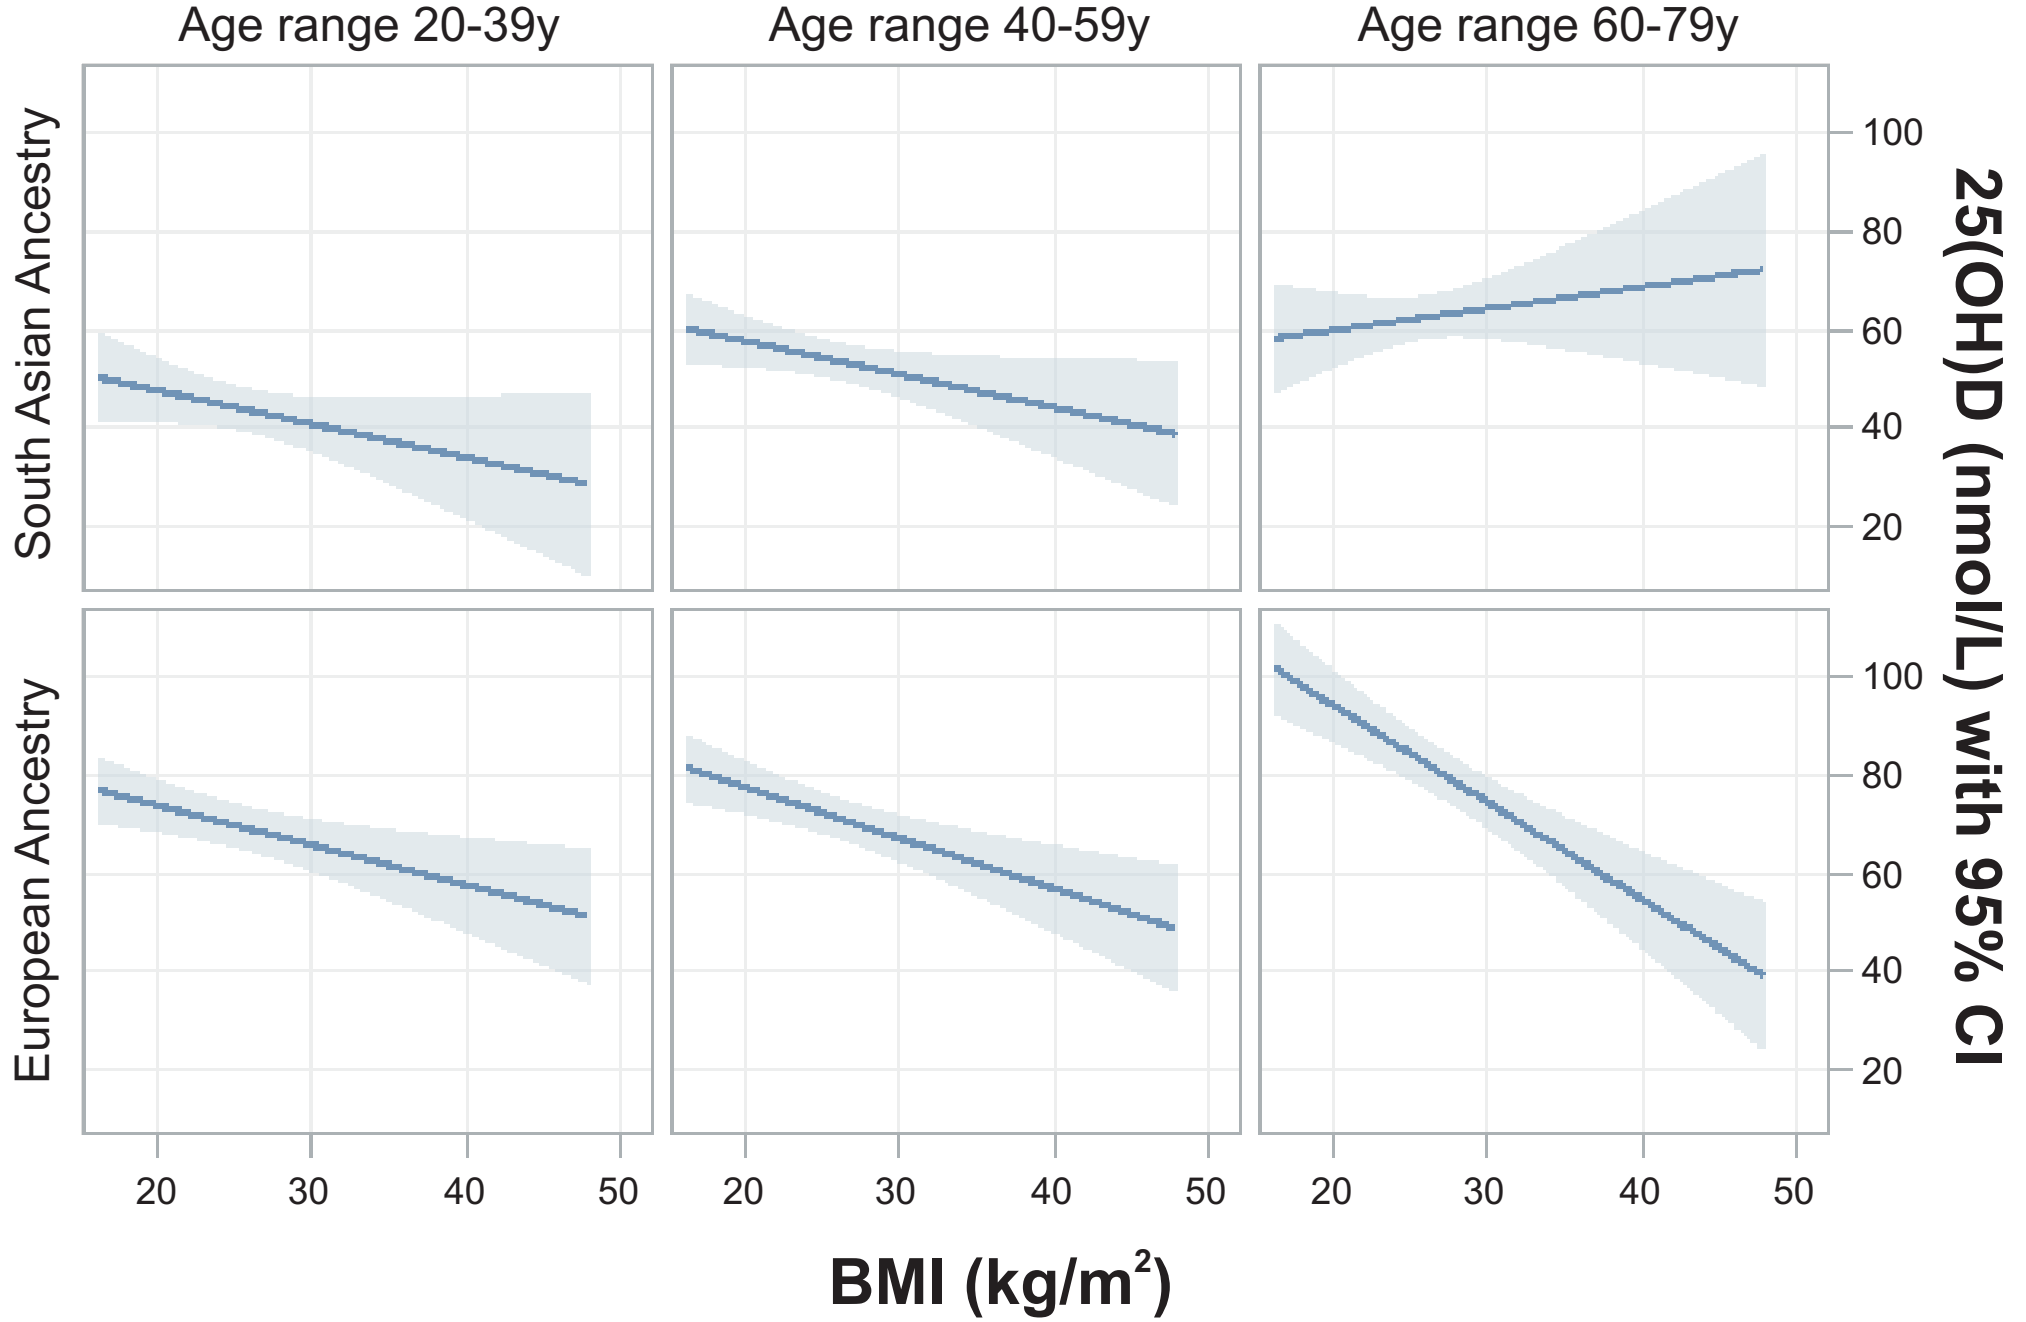

Supplement: pone.0207429.s003.pdf [file pone.0207429.s003.pdf]
